1  
2  
3  
4  
5  
6  
7  
8  
9  
10  
11  
12  
13  
14  
15  
16  
17  
18  
19  
20  
21  
22  
23  
24  
25  
26  
27  
28  
29  
30  
31  
32  
33  
34  
35  
36  
37

## FRONT MATTER

### Title

Full: Climate-driven shifts in sediment chemistry enhance methane production in northern lakes

Short: Enhanced methane production in lakes

### Authors

E. J. S. Emilson<sup>1\*</sup>, M. A. Carson<sup>2</sup>, K. M. Yakimovich<sup>2</sup>, J. M. Gunn<sup>2</sup>, N. C. S. Mykytczuk<sup>2</sup>, N. Basiliko<sup>2</sup>, and A. J. Tanentzap<sup>1</sup>

### Affiliations

<sup>1</sup>Ecosystems and Global Change Group, Department of Plant Sciences, University of Cambridge, Cambridge, United Kingdom, CB2 3EA.

<sup>2</sup>Vale Living with Lakes Centre, Laurentian University, Sudbury, ON, Canada, P3E 2C6.

\* Erik John Szkokan Emilson ([es657@cam.ac.uk](mailto:es657@cam.ac.uk)).

**One-sentence summary:** Production of methane from lakes is at least 400-times lower when sediments receive forest- as opposed to macrophyte-derived (*Typha latifolia*) litterfall.

### Abstract

Freshwater ecosystems are a major source of methane (CH<sub>4</sub>), contributing 0.65 Pg (in CO<sub>2</sub> equivalents) yr<sup>-1</sup> towards global carbon (C) emissions and thereby offsetting ~25% of the terrestrial carbon sink. Most CH<sub>4</sub> emissions come from littoral sediments, where large quantities of plant material are decomposed. As climate change is predicted to shift plant community composition, and thus change the quality of inputs into detrital food webs, this can affect CH<sub>4</sub> production and have far-reaching consequences for global C emissions. Here we find that variation in polyphenol availability from decomposing organic matter underlies large differences in CH<sub>4</sub> production in lake sediments. Production was at least 400-times higher from sediments

38 composed of macrophyte litter compared to terrestrial sources (coniferous and deciduous), which  
39 we link to the inhibition of methanogenesis by polyphenol leachates. Applying our estimates to  
40 projected northward advances in the distribution of *Typha latifolia*, a widespread and dominant  
41 macrophyte, we find that CH<sub>4</sub> production could increase by at least 73% in the lake-rich Boreal  
42 Shield ecozone solely due to increases in this one macrophyte species. Our results now suggest  
43 that earth system models and carbon budgets should consider the effects of plant communities on  
44 sediment chemistry and ultimately CH<sub>4</sub> emissions at a global scale.

45

## 46 MAIN TEXT

### 47 48 Introduction

49 Lentic freshwater ecosystems are a major source of methane (CH<sub>4</sub>), contributing 0.65 Pg  
50 (in CO<sub>2</sub> equivalents) yr<sup>-1</sup> towards global carbon (C) emissions and accounting for an estimated 6  
51 to 16% of natural CH<sub>4</sub> emissions as compared to 1% from the oceans (1). Freshwater CH<sub>4</sub>  
52 emissions are enough to offset an estimated ~25% of the terrestrial carbon sink in CO<sub>2</sub>  
53 equivalents (2). Within individual lakes, up to 77% of CH<sub>4</sub> emissions can come from production  
54 in littoral sediments, where warm temperatures and accumulated organic matter (OM) promote  
55 methanogen activity and ebullition (3–5), and shallow waters and wave action facilitate rapid  
56 diffusion (6, 7).

57 In northern (temperate and boreal) lakes, which account for most of the planet's ice-free  
58 freshwater (8, 9), rates of CH<sub>4</sub> emission from littoral sediments are known to vary by at least three  
59 orders of magnitude (3), leaving considerable uncertainty to be explained in regional and global C  
60 budgets. In general, emissions are highest where littoral zones are covered with macrophytes (3),  
61 and plant-related CH<sub>4</sub> fluxes remain one of the least-understood components of the global  
62 methane budget (10). Emergent aquatic plants can directly transport CH<sub>4</sub> to the atmosphere  
63 through aerenchyma cells, but this cannot explain all of the variability observed within vegetated  
64 littoral zones (7, 11, 12), nor can differences in sediment temperature and OM content (13).  
65 Another explanation is that the activity of sediment microbial communities is inhibited, to varying  
66 degrees, by the breakdown of different OM sources (14), resulting in variation in the production  
67 of CH<sub>4</sub> in littoral sediments.

68 Water-soluble polyphenol compounds from plant litter have specifically been shown to  
69 bind to and inactivate extracellular enzymes and exert toxicity in methanogens (15, 16). These  
70 compounds build-up in anaerobic soils and sediments because oxygen limitation restricts phenol  
71 oxidase activity and dark conditions prevent photodegradation (15, 17). In this way, the buildup

72 of polyphenolic compounds may act similar to a ‘latch’, suppressing CH<sub>4</sub> production and holding  
73 in place large quantities of C in lake sediments that would otherwise be released as CH<sub>4</sub>. Oxygen  
74 limitation plays a similar role in sequestering CO<sub>2</sub> in peatlands by restraining phenol oxidase  
75 activity (17), and rates of CH<sub>4</sub> production have been related to peat chemical composition (18).

76 Here we show that the production of CH<sub>4</sub> in northern lakes can vary by at least 400-times  
77 because of differences in sediment chemistry related to sources of plant litterfall. We predict that  
78 sediments will differ in concentration of methanogenesis-inhibiting polyphenols according to  
79 incoming sources of OM. To test the effects of these differences in sediment chemistry on CH<sub>4</sub>  
80 production in lakes, we compared natural sediments amended with OM from three widespread  
81 sources in north-temperate watersheds that would be expected to vary in polyphenol content:  
82 mixed coniferous forest litter (CON), mixed deciduous forest litter (DEC), and litter from a  
83 ubiquitous emergent macrophyte, *Typha latifolia* (TYP). The sediments were mixed at 20% OM  
84 to approximate the average concentrations found in littoral zones of northern lakes (19), and  
85 incubated in controlled conditions to control other effects, such as temperature, light exposure,  
86 and differences in ambient water quality, which confound observational studies. As northern  
87 watersheds are expected to experience a shift in forest composition (20, 21) and an increase in  
88 emergent macrophyte growth in lakes (22, 23), these findings present an additional mechanism to  
89 increased mineralization and permafrost thaw (24, 25) by which climate change can enhance CH<sub>4</sub>  
90 emission from northern lakes.

91

## 92 **Results and Discussion**

93 After 150 days of laboratory incubation, CH<sub>4</sub> production was over 400-times higher on  
94 average from *Typha latifolia* (TYP) sediments than from mixed-coniferous (CON) sediments,  
95 almost 2,800-times higher than from mixed-deciduous (DEC) sediments, and 1400-times higher  
96 than un-amended controls with 0.3% OM (CTR). In contrast, the CON and DEC treatments did

97 not significantly differ from CTR, suggesting that methanogenesis was inhibited in the sediments  
98 amended with forest litter (Fig. 1). Our estimated CH<sub>4</sub> production rates for a 150-day growing  
99 season ranged from averages of 2.63 mg m<sup>-2</sup> to 7.22 × 10<sup>3</sup> mg m<sup>-2</sup> amongst the DEC-, CON-, and  
100 TYP-amended sediments. These production rates were comparable on a per-area basis to the  
101 range and variability of emissions measured in-situ in littoral zones of northern lakes (3),  
102 reflecting the close relationship between production and emission in shallow waters (7). We also  
103 found comparable patterns when repeating the experiment with sediments of 10 and 40% OM  
104 (Supplementary Fig. S1). A lack of differences in CO<sub>2</sub> production rates amongst the amended  
105 sediments further suggested that inhibition of methanogenesis and not microbial activity in  
106 general was responsible for variation in CH<sub>4</sub> production (Supplementary Fig. S2).

107 We took two approaches to test the hypothesis that inhibition of methanogenesis was  
108 occurring in the lake sediments amended with forest-derived OM (CON- and DEC-treatments).  
109 Firstly, we measured the relative abundance of methanogens using qPCR targeting the *mcrA* gene  
110 and found on average 1.72 × 10<sup>2</sup> and 1.33 × 10<sup>4</sup> fewer *mcrA* copies in the CON and DEC  
111 sediments, respectively, compared to the TYP sediments (Fig. 2). These relative abundances  
112 mirrored patterns of CH<sub>4</sub> production in Fig. 1, suggesting that suppression of methanogen growth  
113 was related to decreased production of CH<sub>4</sub>. Although relative abundance of the *mcrA* gene that  
114 we assayed does not entirely equate with specific activity of methanogen communities, there is  
115 strong evidence linking it with CH<sub>4</sub> production both here (i.e. Figs. 1-2) and in previous studies  
116 (26, 27).

117 The second approach we took to test for inhibition of methanogenesis was to conduct a  
118 parallel set of incubations where we added a small quantity of a methane-rich sediment ‘spike’ to  
119 our treatments at the start of the experiment. Concurrent with our hypothesis of inhibition by  
120 plant-derived compounds, there was no change in CH<sub>4</sub> production in the DEC or CON sediments  
121 with the spike added, but CH<sub>4</sub> production doubled in the TYP sediment, and increased most

122 strongly in the un-amended control sediments (Fig. 1). The inhibition of CH<sub>4</sub> production in  
123 sediments composed of forest-derived compared to macrophyte-derived OM now offers a new  
124 mechanism to explain previously described observations in lakes wherein most of the CH<sub>4</sub>  
125 emissions come from littoral zones covered with macrophytes (3).

126 Measurements of the biochemical composition of decomposing OM support our  
127 conclusion that the inhibition of methanogenesis was caused by polyphenols from the forest-  
128 derived OM. Fluorescence excitation-emission matrices of OM in sediment porewater across all  
129 the treatments revealed the presence of a protein-like fluorescence component that was associated  
130 with water-soluble polyphenolic leaf leachates (28, 29), in addition to the ubiquitous tryptophan-  
131 and tyrosine-like components (Supplementary Fig. S3). Relative concentration of this water-  
132 soluble polyphenol component was lowest in the porewater of the TYP sediments, highest in the  
133 DEC sediments, and undetectable in the un-amended CTR sediments. We further found that CH<sub>4</sub>  
134 production decreased with relative polyphenol concentration across all the amended sediment  
135 types and OM concentrations, suggesting that suppressed methanogenesis in CON and DEC  
136 sediments was related to water-soluble polyphenols (Fig. 3). These polyphenol leaf leachates  
137 were likely inhibiting methanogenesis by reducing enzyme and methanogen activity through  
138 direct toxicity (16, 30), pH depression, and/or other chemical effects (15, 31). Reduction of  
139 methanogenesis can also occur through increased availability of thermodynamically-favourable  
140 pathways in sediments (e.g. sulfate reduction), but we did not detect the presence of sulfate  
141 reducing bacteria in the sediments (below PCR detection limits; Supplementary Table S1) and so  
142 it is likely that sulfate was limiting and/or depleted during the 150-day incubation (30).

143 As sediments amended with TYP produced so much more CH<sub>4</sub> than forest litter (CON and  
144 DEC), our findings may have far-reaching implications for global carbon cycling. For example,  
145 species distribution models (SDMs) predict more favourable climatic conditions for the growth of  
146 TYP and other emergent macrophytes in boreal lakes in the coming decades (23, 32). To consider

147 the implications for CH<sub>4</sub> emissions, we overlaid SDMs produced by Natural Resources Canada  
148 using published methods (21) onto the Boreal Shield, an ecozone with relatively homogenous  
149 underlying geology and plant communities similar to those in our incubations. By then relating  
150 projected occurrence to colonization of suitable lake habitat, we found that the number of lakes  
151 likely to be colonized by *T. latifolia* could increase by 1.7 to 2.5 times between 2041 and 2070  
152 (Supplementary Table S2). Assuming no changes other than macrophyte spread, we estimated  
153 that the increase in *T. latifolia* alone could elevate CH<sub>4</sub> production across Boreal Shield lakes by  
154 at least 73% during a 150-day growing season (Supplementary Table S2, Fig. 4). Of course, these  
155 estimates are heavily caveated by several assumptions. For example, climate-driven changes in  
156 other factors, such as temperature, oxidation potential, and increased forest litterfall production,  
157 will certainly influence CH<sub>4</sub> production from lake sediments, and all production may not  
158 necessarily result in emissions (1). We have also not accounted for aerenchymal transfer, which  
159 may further enhance emissions where TYP is present, nor differential mixing of forest-derived  
160 OM in sediments resulting from expected shifts in deciduous forest cover (33). However our  
161 rough calculation is intended to emphasise that lake sediment chemistry is sufficiently important  
162 that it should be considered in earth system models, or at the very least in lake carbon budgets  
163 (34).

164 Methane production in freshwater ecosystems has recently been recognized as an  
165 important component of global C cycles (2). Here we have discovered a new mechanism by  
166 which plant-related shifts in sediment chemistry under a changing climate can increase methane  
167 production in lakes. This mechanism can account for the observed variability in CH<sub>4</sub> emission  
168 that has been reported both across and within lakes (2, 3), and should enable more precise models  
169 and C budgets in northern watersheds.

170

## 171 **Materials and Methods**

172 *Experimental Design*

173 We amended natural sediments with three different sources: senescent coniferous (CON)  
174 and deciduous (DEC) litterfall from a transitional/mixed forest stand (Central Ontario:  
175 44°7'22.3"N, 79°30'23.7"W), and senescent *Typha latifolia* (TYP) from Ramsey Lake (in  
176 Sudbury, Canada: 46°28'19.8"N 80°58'19.2"W). The CON mix consisted of *Pinus resinosa* and  
177 *Pinus strobus*, and the DEC mix consisted primarily of *Acer rubrum*, *Acer saccharum*, *Betula*  
178 spp., *Populus tremuloides*, *Ulmus americanum*, *Quercus rubra*, and *Quercus alba*. All OM was  
179 oven dried for 12 h at 60 °C, ground, and sieved to retain only the fine particulate organic matter  
180 (FPOM) fraction ( $\leq 1$ mm).

181 We mixed the FPOM with a “base inorganic sediment” (0.3% OM, determined by loss-on-  
182 ignition at 500°C for two hours) to create final OM concentrations (by dry-weight) of 20% across  
183 the three amendments (CON, DEC, TYP). We used 20% to approximate typical OM  
184 concentrations found in littoral zones of northern lakes (19) (and confirmed in a nearby lake (35))  
185 but we also measured CH<sub>4</sub> production with 10 and 40% OM to confirm similarity of patterns  
186 across conditions. The base sediment was collected from the shoreline of Geneva Lake (near  
187 Sudbury, Canada: 46°45'27.2"N, 81°33'19.8"W) away from *T. latifolia* beds and direct inputs of  
188 forest-derived OM and was sieved to exclude particles larger than 2 mm. We distributed the  
189 mixed sediments into 250 mL mason jars equipped with rubber septa, with four replicate jars per  
190 each %OM and amendment type combination. An estimated 70% of methane production occurs  
191 in the top 5 cm of saturated soils (36), so we filled the jars to a depth of 4.5 cm (allowing room  
192 for expansion), before saturating them with TOC-scrubbed A10 MilliQ water (EMD Millipore  
193 Corp., Darmstadt, Germany). We also created replicated control jars containing only base  
194 sediment, otherwise constructed and treated in the same manner.

195 We duplicated the 20% OM experimental setup with a “methane-rich spike”. The spike  
196 consisted of replacing 5% of the base sediment with sediment from the top 5 cm of a littoral site



197 in Ramsey Lake previously known to have high rates of methane production. Amendments of  
198 CON, DEC, TYP were adjusted for the 2.8% OM content of the spike sediment to ensure final  
199 OM concentrations of 20% (dry-weight).

200

### 201 *CH<sub>4</sub> and CO<sub>2</sub> Production*

202 We incubated the sediments and periodically collected headspace samples to measure CH<sub>4</sub>  
203 and CO<sub>2</sub> production over 150 days, representative of the length of a growing season in the Boreal  
204 Shield. The sediments were incubated in a BioChambers SPC-56 growth chamber in the dark at  
205 20.5°C. At the start of the incubations, headspace air in each jar was replaced four times with N<sub>2</sub>  
206 using a vacuum manifold to ensure anaerobic conditions and removal of atmospheric CO<sub>2</sub> and  
207 CH<sub>4</sub>. We collected headspace gas on days 5, 10, 15, 31, 60, 91, 120, and 150 by homogenizing 10  
208 mL of N<sub>2</sub> into headspace prior to extracting a 10 mL gas sample by syringe. The total volume  
209 removed was quantified and used to correct headspace volume throughout the incubation. Both  
210 CH<sub>4</sub> and CO<sub>2</sub> were detected as CH<sub>4</sub> using a SRI 8610C gas chromatograph (0.5 mL sample loop,  
211 105°C column temperature), and production was calculated at the end of 150 days, adding back  
212 the portions that were removed and expressing totals as mg m<sup>-2</sup> of dry sediment given an area of  
213 28.3 cm<sup>2</sup> for each jar.

214

### 215 *Relative Polyphenol Concentration*

216 To measure relative polyphenol concentration, we collected porewater from each jar after  
217 the 150-day incubations and filtered the samples through 0.5 µm glass fiber filters. Samples were  
218 acidified to pH < 2 with HCl, and stored in airtight vials at ~4°C. Fluorescence EEMs (excitation-  
219 emission matrices) were generated using an Agilent Cary Eclipse Fluorescence  
220 Spectrophotometer in ratio (S/R) mode with a 1 cm path-length cuvette. EEMs were generated  
221 from excitation and emission intensities (EX: 250 to 450 nm in 5 nm steps, EM: 300 to 600 nm in

222 2 nm steps) that were adjusted for inner-filter effects with absorbance as measured with an  
223 Agilent Cary 60 UV-Vis Spectrophotometer. All EEM sample correction and PARAFAC  
224 modelling was done in Matlab R2015b according to the methods outlined in ref. (37).

225 Five PARAFAC components were validated by a split-half method (37), explaining 98.7%  
226 of the variation in the EEMs. Components C1 and C2 were comparable to common humic-like  
227 components, with maximum excitation/emission intensities of (310/414 nm) and (345/462 nm)  
228 respectively. C3 was similar to the common tryptophan protein-like component (280/354 nm),  
229 and C4 the common tyrosine protein-like component (270/306 nm). Component C5 (275/318 nm)  
230 was identified as a protein-like component that is associated with leaf litter polyphenol leachates  
231 (28, 29) (Supplementary Fig. S3). Therefore, relative polyphenol leachate concentration was  
232 estimated as the product of proportional C5 fluorescence and total dissolved organic carbon  
233 (DOC) concentration in sediment porewater, as measured on a Shimadzu TOC-5000A in FPOC  
234 mode.

235

### 236 *Methanogen Suppression*

237 To compare the relative abundance of methanogens between samples, DNA was first  
238 extracted in duplicate using the MoBio PowerSoil kit (MoBio, Carlsbad, CA, USA). qPCR was  
239 then carried out in triplicate on pooled DNA extractions to characterize better the communities  
240 from the 4 sediment replicates of the CTR and each OM type mixed at 10, 20 and 40%  
241 concentration. The *mcrA* gene was targeted using mlasF (5'-  
242 GGYGGTGTMGDDTTCACMCARTA-3') and mcrA-rev (5'-  
243 CGTTCATBGCGTAGTTVGGRTAGT-3') primers as in ref. (26). Reaction conditions were: a 5-  
244 minute initial denaturation at 95 °C, followed by 45 cycles of 95 °C for 15 seconds, 55 °C for 30  
245 seconds, and 72 °C for 30 seconds. Then a final denaturation for 1 minute at 95 °C, 30 seconds at  
246 42 °C and 95 °C for 30 seconds. The qPCR was done using Biorad's iTaq Universal SYBR Green

247 Supermix on an Agilent Technologies Stratagene Mx3005P. A standard curve was generated by  
248 serially diluting an extracted band from amplified eDNA and run in triplicate along with the  
249 samples generating an  $R^2 = 0.999$  and efficiency of 97.2%. Dissociation curves indicated a pure  
250 product, which was confirmed on a 1.5% agarose gel. eDNA was quantified and purity was  
251 checked (260/280 nm ratio) using a Take3 spectrophotometry system on a Synergy HI microplate  
252 reader (BioTek, Winooski VT, USA). Dissociation curves indicated a pure product, which was  
253 confirmed on a 1.5% agarose gel. The results were calculated by averaging the triplicate Ct  
254 values, and abundances were standardized relative to the control and expressed per dry weight of  
255 sediment normalized for extraction efficiency. Suppression of methanogens could also be caused  
256 by sulfate reducing bacteria (SRB). To test for this, we used PCR to target the SRB-specific *dsrA*  
257 gene and 16S rRNA deep sequencing to evaluate their abundance (see Supplementary Methods  
258 S1).

259

### 260 *Ecosystem-scale Emissions*

261 We estimated the impact of increased *T. latifolia* occurrence on CH<sub>4</sub> production during the  
262 growing season by applying our estimated production rates (mg m<sup>-2</sup>) to current and projected  
263 aerial cover (m<sup>2</sup>) for Boreal Shield lakes. Surface areas were obtained from the Global Lakes and  
264 Wetlands Database (GLWD) (8) for waterbodies between 0.1 and 1,000 km<sup>2</sup> in size and located  
265 within the Boreal Shield (spatially delineated by the National Ecological Framework for Canada  
266 (38) as an area of 1.8 million km<sup>2</sup> located between ca. 45°N and 60°N characterized by underlying  
267 Precambrian bedrock). For each lake, we extracted current and projected probability of  
268 occurrence of *T. latifolia* from Natural Resources Canada MaxEnt raster data, which was  
269 developed by combining species occurrence data with actual climate data (for current estimates)  
270 and with climate models (GCMs) (21, 32). We used projected MaxEnt occurrences for the  
271 timeframe of 2041-2070 incorporating uncertainty by using five climate models [canESM2,

272 hadGEM2-ES, CESM1(CAM5), MIROC-ESM-CHEM, and composite-AR5] each with three  
273 future emission scenarios (RCP 2.6, 4.5 and 8.5).

274 We then used the range in the probability of occurrence data to estimate a range in  
275 projected suitable habitat and thus proportional coverage within Boreal Shield lakes. Suitable  
276 emergent macrophyte habitat (shallow littoral) areas are not widely available, so we used  
277 published regressions indicating a maximum of 28% of lake area to be covered by emergent  
278 macrophytes, on average, for Boreal lakes in our size range (39). We then estimated coverage as  
279 the product of the probability of occurrence and 28% of the total lake areas that were widely  
280 available across the Boreal from the GLWD. Thus, a probability of occurrence of 1 meant all  
281 suitable habitat, or 28% of total lake area, was covered in a given lake. We then calculated total  
282 CH<sub>4</sub> production as the product of the rate of production (mg m<sup>-2</sup>) in our incubation study and  
283 coverage by *T. latifolia* (m<sup>2</sup>, current and projected), propagating uncertainty from climate models  
284 and scenarios along with variation in our CH<sub>4</sub> production estimates. Estimates were scaled up to  
285 100% of the sediment profile assuming our 5 cm surficial sediments represented 70% of total  
286 production (36) and presented in CO<sub>2</sub> equivalents (1 kg CH<sub>4</sub> = 25 kg CO<sub>2</sub>) to maintain  
287 consistency with global emission estimates in ref. (2).

288

### 289 *Statistical Analysis*

290 To compare production rates across OM type, we performed a one-way ANOVA in R  
291 3.3.0 (40). The ANOVA included the effect of type and its interaction with the methanogen spike  
292 with the baseline (intercept) group adjusted to compare significance among groups. The ANOVA  
293 was repeated for 10, 20, and 40% OM separately. We then fit a log-log model in R 3.3.0 (32) to  
294 test for an effect of relative polyphenol concentrations on CH<sub>4</sub> production. All spatial analyses  
295 were also done with R v. 3.3.0 (40).

296

## Supplementary Materials

Methods S1. PCR detection and 16S rRNA sequencing libraries for sulfate reducing bacteria.

Fig. S1. CH<sub>4</sub> production in 10 (A) and 40% (B) amendments.

Fig. S2. CO<sub>2</sub> production in amended sediments.

Fig. S3. Five dissolved organic matter PARAFAC components identified in sediment porewater.

Table S1. PCR results for sulphate reducing bacteria (SRB).

Table S2. Production estimates from Boreal Shield lakes for a 150-day growing season.

## References and Notes

1. G. Borrel *et al.*, Production and consumption of methane in freshwater lake ecosystems. *Res. Microbiol.* **162**, 832–847 (2011).
2. D. Bastviken, L. J. Tranvik, J. A. Downing, P. M. Crill, A. Enrich-Prast, Freshwater Methane Emissions Offset the Continental Carbon Sink. *Science*,. **331**, 50–50 (2011).
3. S. Juutinen *et al.*, Major implication of the littoral zone for methane release from boreal lakes. *Global Biogeochem. Cycles*. **17**, 1–11 (2003).
4. C. Gudas *et al.*, Temperature-controlled organic carbon mineralization in lake sediments. *Nature*. **466**, 478–481 (2010).
5. W. E. West, K. P. Creamer, S. E. Jones, Productivity and depth regulate lake contributions to atmospheric methane. *Limnol. Oceanogr.* **61**, S51–S61 (2016).
6. H. Hofmann, L. Federwisch, F. Peeters, Wave-induced release of methane: Littoral zones as source of methane in lakes. *Limnol. Oceanogr.* **55**, 1990–2000 (2010).
7. D. Bastviken, J. J. Cole, M. L. Pace, M. C. Van de Bogert, Fates of methane from different lake habitats: Connecting whole-lake budgets and CH<sub>4</sub> emissions. *J. Geophys. Res.* **113**, 1–13 (2008).
8. B. Lehner, P. Döll, Development and validation of a global database of lakes, reservoirs and wetlands. *J. Hydrol.* **296**, 1–22 (2004).
9. J. A. Downing *et al.*, The global abundance and size distribution of lakes, ponds, and impoundments. *Limnol. Oceanogr.* **51**, 2388–2397 (2006).
10. M. J. Carmichael, E. S. Bernhardt, S. L. Bräuer, W. K. Smith, The role of vegetation in methane flux to the atmosphere: Should vegetation be included as a distinct category in the global methane budget? *Biogeochemistry*. **119**, 1–24 (2014).
11. J. B. Yavitt, A. K. Knapp, Methane emission to the atmosphere through emergent cattail (*Typha latifolia* L.) plants. *Tellus*. **47** (1995), pp. 521–534.
12. C. M. Poindexter, D. D. Baldocchi, J. H. Matthes, S. H. Knox, E. A. Variano, The contribution of an overlooked transport process to a wetland’s methane emissions. *Geophys. Res. Lett.* **43**, 6276–6284 (2016).
13. P. Kankaala *et al.*, Methane efflux in relation to plant biomass and sediment characteristics in stands of three common emergent macrophytes in boreal mesoeutrophic lakes. *Glob. Chang. Biol.* **11**, 145–153 (2005).
14. W. E. West, J. J. Coloso, S. E. Jones, Effects of algal and terrestrial carbon on methane production rates and methanogen community structure in a temperate lake sediment. *Freshw. Biol.* **57**, 949–955 (2012).

- 347 15. R. G. Wetzel, Gradient-dominated ecosystems: sources and regulatory functions of  
348 dissolved organic matter in freshwater ecosystems. *Hydrobiologia*. **229**, 181–198 (1992).
- 349 16. J. A. Field, M. J. H. Leyendekers, R. Sierra Alvarez, G. Lettinga, L. H. A. Habets,  
350 Methanogenic toxicity of bark tannins and the anaerobic biodegradability of water soluble  
351 bark matter. *Water Sci. Technol.* **20**, 219–240 (1988).
- 352 17. C. Freeman, N. Ostle, H. Kang, An enzymic “latch” on a global carbon store. *Nature*. **409**,  
353 149–150 (2001).
- 354 18. J. B. Yavitt, C. J. Williams, R. K. Wieder, Production of methane and carbon dioxide in  
355 peatland ecosystems across North America: Effects of temperature, aeration, and organic  
356 chemistry of peat. *Geomicrobiol. J.* **14**, 299–316 (1997).
- 357 19. W. E. Dean, The carbon cycle and biogeochemical dynamics in lake sediments. *J.*  
358 *Paleolimnol.* **21**, 375–393 (1999).
- 359 20. A. Terrier, M. P. Girardin, C. Périé, P. Legendre, Y. Bergeron, Potential changes in forest  
360 composition could reduce impacts of climate change on boreal wildfires. *Ecol. Appl.* **23**,  
361 21–35 (2013).
- 362 21. D. W. Mckenney, J. H. Pedlar, R. B. Rood, D. Price, Revisiting projected shifts in the  
363 climate envelopes of North American trees using updated general circulation models. *Glob.*  
364 *Chang. Biol.* **17**, 2720–2730 (2011).
- 365 22. E. Jeppesen *et al.*, Climate change effects on runoff, catchment phosphorus loading and  
366 lake ecological state, and potential adaptations. *J. Environ. Qual.* **38**, 1930–1941 (2009).
- 367 23. J. Alahuhta, J. Heino, M. Luoto, Climate change and the future distributions of aquatic  
368 macrophytes across boreal catchments. *J. Biogeogr.* **38**, 383–393 (2011).
- 369 24. M. Wik, R. K. Varner, K. W. Anthony, S. MacIntyre, D. Bastviken, Climate-sensitive  
370 northern lakes and ponds are critical components of methane release. *Nat. Geosci.* **9**, 99–  
371 106 (2016).
- 372 25. H. Marotta, L. Pinho, C. Gudas, Greenhouse gas production in low-latitude lake  
373 sediments responds strongly to warming. *Nat. Clim. Chang.* **4**, 11–14 (2014).
- 374 26. R. Angel, P. Claus, R. Conrad, Methanogenic archaea are globally ubiquitous in aerated  
375 soils and become active under wet anoxic conditions. *ISME J.* **6**, 847–862 (2012).
- 376 27. T. E. Freitag, J. I. Prosser, Correlation of methane production and functional gene  
377 transcriptional activity in a peat soil. *Appl. Environ. Microbiol.* **75**, 6679–6687 (2009).
- 378 28. Y. Yamashita, R. Jaffé, N. Maie, E. Tanoue, Assessing the dynamics of dissolved organic  
379 matter (DOM) in coastal environments by excitation emission matrix fluorescence and  
380 parallel factor analysis (EEM-PARAFAC). *Limnol. Oceanogr.* **53**, 1900–1908 (2008).
- 381 29. N. Maie, O. Pisani, R. Jaffé, Mangrove tannins in aquatic ecosystems: Their fate and  
382 possible influence on dissolved organic carbon and nitrogen cycling. *Limnol. Oceanogr.*  
383 **53**, 160–171 (2008).
- 384 30. C. A. Medvedeff, S. D. Bridgham, L. Pfeifer-Meister, J. K. Keller, Can Sphagnum leachate  
385 chemistry explain differences in anaerobic decomposition in peatlands? *Soil Biol. Biochem.*  
386 **86**, 34–41 (2015).
- 387 31. G. D. Joannis, R. L. Bradley, C. M. Preston, A. D. Munson, Soil enzyme inhibition by  
388 condensed litter tannins may drive ecosystem structure and processes: The case of *Kalmia*  
389 *angustifolia*. *New Phytol.* **175**, 535–546 (2007).
- 390 32. D. W. Mckenney, J. H. Pedlar, K. Lawrence, K. Campbell, M. F. Hutchinson, Beyond  
391 traditional hardiness zones: Using climate envelopes to map plant range limits. *Bioscience.*  
392 **57**, 929–937 (2007).
- 393 33. L. Boisvert-Marsh, C. Périé, S. de Blois, *Ecosphere*, in press, doi:10.1890/ES14-00111.1.
- 394 34. P. C. Hanson, M. L. Pace, S. R. Carpenter, J. J. Cole, E. H. Stanley, Integrating Landscape  
395 Carbon Cycling: Research Needs for Resolving Organic Carbon Budgets of Lakes.  
396 *Ecosystems*, 363–375 (2014).



- 397 35. A. J. Tanentzap *et al.*, Bridging between litterbags and whole-ecosystem experiments: a  
398 new approach for studying lake sediments. *J. Limnol.* (2017),  
399 doi:10.4081/jlimnol.2017.1588.
- 400 36. A. Van Den Pol-van Dasselaar, O. Oenema, Methane production and carbon mineralisation  
401 of size and density fractions of peat soils. *Soil Biol. Biochem.* **31**, 877–886 (1999).
- 402 37. K. R. Murphy, C. A. Stedmon, D. Graeber, R. Bro, Fluorescence spectroscopy and multi-  
403 way techniques. PARAFAC. *Anal. Methods.* **5**, 6557–6566 (2013).
- 404 38. Ecological Stratification Working Group, “A National Ecological Framework for Canada”  
405 (Agriculture and Agri-Food Canada, Research Branch, Centre for Land and Biological  
406 Resources Research and Environment Canada, Ottawa, 1995).
- 407 39. C. M. Duarte, J. Kalff, R. H. Peters, Patterns in biomass and cover of aquatic macrophytes  
408 in lakes. *Can. J. Fish. Aquat. Sci.* **43**, 1900–1908 (1986).
- 409 40. R Core Team, *R: A language and environment for statistical computing* (R Foundation for  
410 Statistical Computing, Vienna, Austria, 2016).
- 411 41. S. Takahashi, J. Tomita, K. Nishioka, T. Hisada, M. Nishijima, Development of a  
412 prokaryotic universal primer for simultaneous analysis of Bacteria and Archaea using next-  
413 generation sequencing. *PLoS One.* **9** (2014), doi:10.1371/journal.pone.0105592.
- 414 42. T. Z. DeSantis *et al.*, Greengenes, a chimera-checked 16S rRNA gene database and  
415 workbench compatible with ARB. *Appl. Environ. Microbiol.* **72**, 5069–5072 (2006).
- 416 43. J. G. Caporaso *et al.*, QIIME allows analysis of high-throughput community sequencing  
417 data. *Nat. Methods.* **7**, 335–336 (2010).
- 418 44. A. P. Masella, A. K. Bartram, J. M. Truszkowski, D. G. Brown, J. D. Neufeld, PANDAseq:  
419 paired-end assembler for illumina sequences. *BMC Bioinformatics.* **13**, 31 (2012).
- 420 45. P. J. McMurdie, S. Holmes, Phyloseq: An R Package for Reproducible Interactive Analysis  
421 and Graphics of Microbiome Census Data. *PLoS One.* **8** (2013),  
422 doi:10.1371/journal.pone.0061217.
- 423 46. M. I. Love, W. Huber, S. Anders, Moderated estimation of fold change and dispersion for  
424 RNA-seq data with DESeq2. *Genome Biol.* **15**, 550 (2014).
- 425 47. D. G. Bourne, A. Muirhead, Y. Sato, Changes in sulfate-reducing bacterial populations  
426 during the onset of black band disease. *ISME J.* **5**, 559–64 (2011).
- 427  
428  
429

430 **Acknowledgements:** We acknowledge the support of staff and colleagues at the Living with  
431 Lakes Centre, Laurentian University, in Sudbury Canada. We also thank John Pedlar and Dan  
432 McKenney at Natural Resources Canada for providing spatial MaxENT data. **Funding:** Support  
433 was provided by NERC Standard Grant NE/L006561/1. **Author contributions:** ESE, MC, JG,  
434 NM, NB, and AJT conceived the study. ESE, MC, and KY collected the data, and ESE analyzed  
435 the data and wrote the manuscript with input from all authors. **Competing interests:** The authors  
436 declare that they have no competing interests. **Data and materials availability:** All data are  
437 present in the paper and/or the Supplementary Materials. Additional data related to this paper may

438 be requested from the authors. All SRB related sequences have been deposited in the NCBI  
439 Sequence Read Archive under BioProject PRJNA347436.

440

441



442 **Figures and Tables**

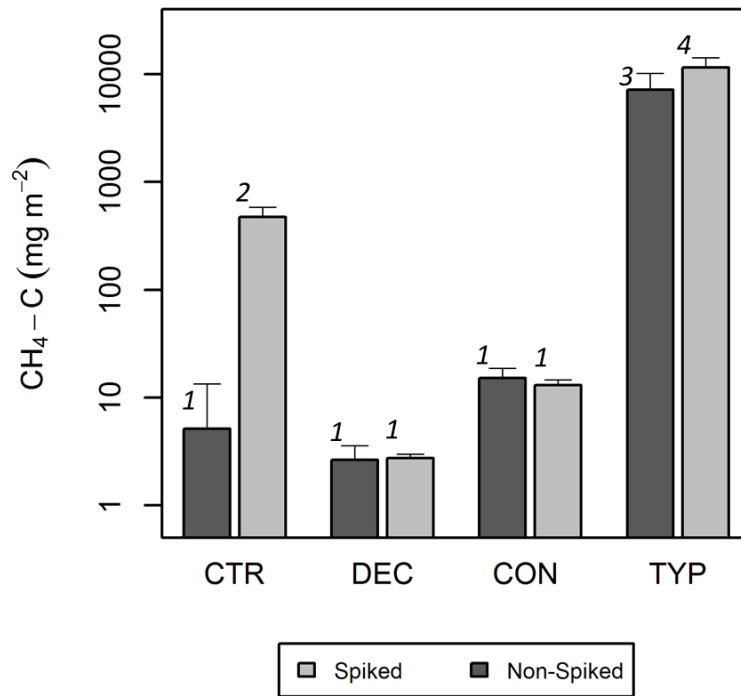

443 **Fig. 1: CH<sub>4</sub> production in amended sediments.** Production over a 150-day growing season is  
444 orders of magnitude higher in sediments amended with 20% organic matter from emergent  
445 macrophyte (*Typha latifolia*; TYP) litter than deciduous (DEC) or coniferous (CON) forest litter.  
446 CH<sub>4</sub> production increases further with addition of methanogen-rich sediment (i.e. spiked-  
447 treatments) only in control (CTR) and TYP sediments. Different numbers (1-4) represent  
448 significant differences ( $p < 0.05$ ) among amendments (ANOVA  $F_{7,24} = 39.47$ ). Results are  
449 shown on a log scale because of large differences between TYP and the other amendments, and  
450 error bars represent standard errors in production estimates.  
451

452

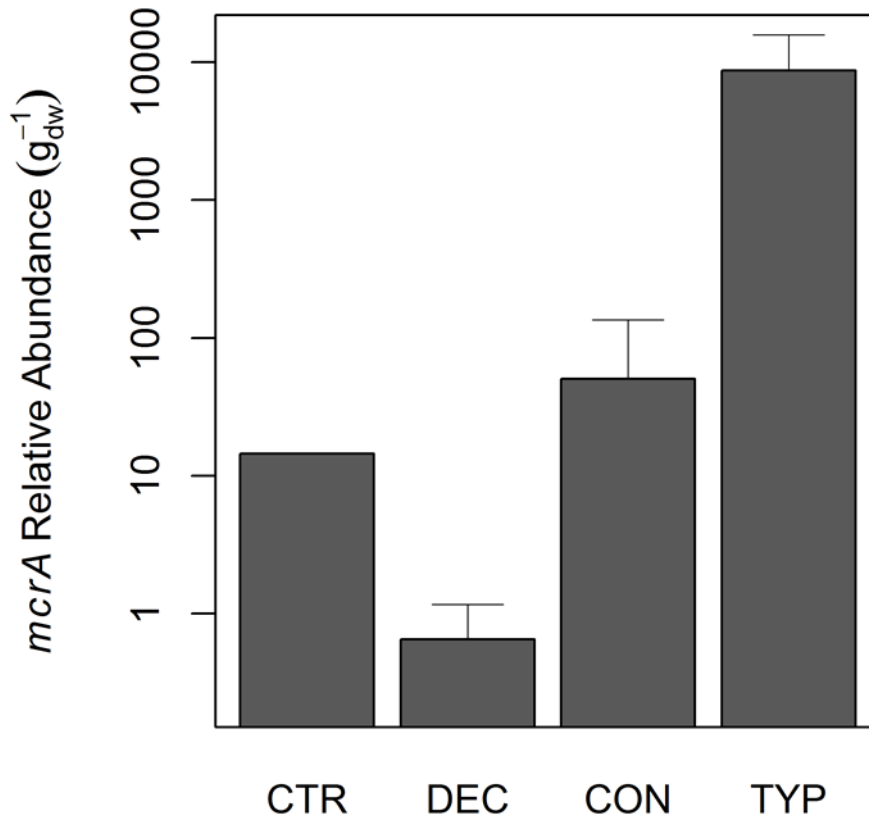

453

454 **Fig. 2: Relative abundance of *mcrA* gene copies in amended sediments.** Relative abundance is  
455 orders of magnitude higher in sediments amended with emergent macrophyte (*Typha latifolia*;  
456 TYP) litter than deciduous (DEC) or coniferous (CON) forest litter and mirrors CH<sub>4</sub> production in  
457 Fig. 1. DNA was pooled across replicates (n = 4 per %OM treatment) and expressed per gram  
458 dry-weight (g<sub>dw</sub>) of sediment normalized for extraction yield determined by qPCR. Error bars for  
459 amendments represent standard error across %OM treatments.

460

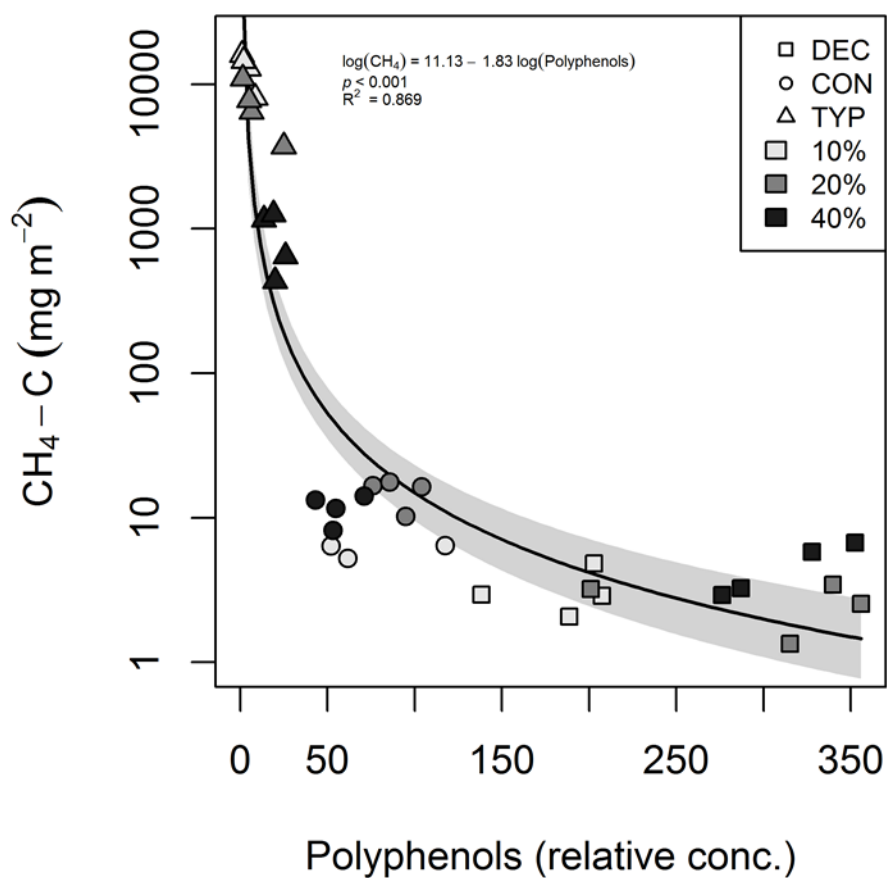

461

462 **Fig. 3: CH<sub>4</sub> production in sediments declines with polyphenols.** The relationship is shown

463 across OM amendment type (DEC, CON, and TYP) and concentrations (10, 20, 40%).

464 Concentrations of polyphenols are relative and determined from fluorescence excitation-emission  
465 spectroscopy.

466

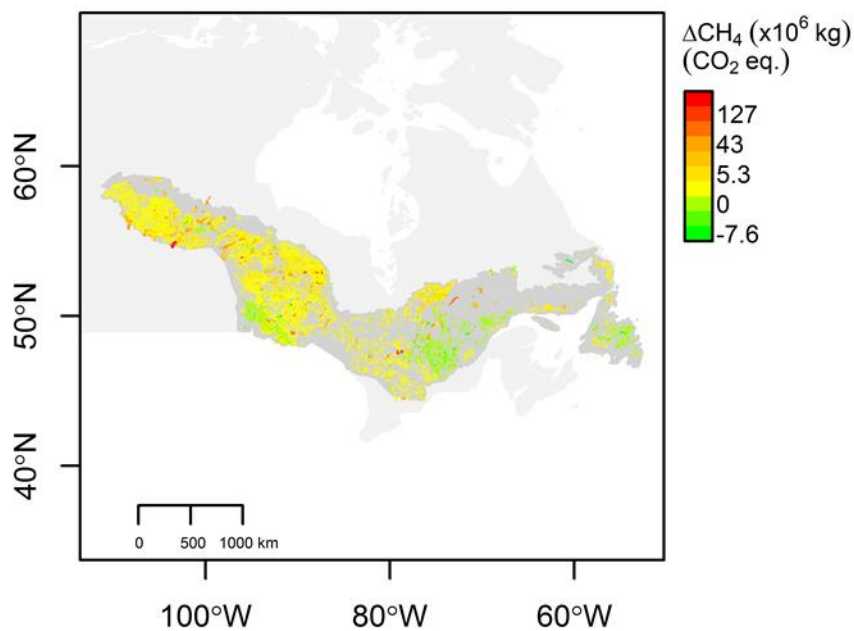

467

468 **Fig. 4: Predicted increase in CH<sub>4</sub> production across the Boreal Shield.** An increase of at least

469 73% is predicted because of the greater probability of occurrence of *Typha latifolia* alone.

470 Estimated change in production is shown here as change in total kg of CH<sub>4</sub> (CO<sub>2</sub> equivalents)

471 from current (1971-2001) to future (2041-2070) over a 150-day growing season in each lake

472 under Composite-AR5 RCP 4.5 climate scenario.

473
